# Supplementary material for: Heavy snow: IR spectroscopy of isotope mixed crystalline water ice
Source: Royal Society of Chemistry journal article supplement (doi:10.1039/c5cp06756a), 2016-01-01
Supplement: c5cp06756a1.pdf [file c5cp06756a1.pdf]

**Supporting data for:**

**Heavy Snow: IR spectroscopy of isotope mixed crystalline water ice**

**Authors**

Andy Wong<sup>1</sup>, Liang Shi<sup>2</sup>, Rebecca Auchetti<sup>3</sup>, Don McNaughton<sup>1</sup>, Dominique Appadoo<sup>4</sup>, Evan G. Robertson<sup>3\*</sup>.

1. School of Chemistry, Monash University, Wellington Road, Clayton, Victoria, 3800, Australia.

2. Theoretical Chemistry Institute and Department of Chemistry, University of Wisconsin, Madison, Wisconsin 53706, USA.

3. Department of Chemistry and Physics, La Trobe Institute for Molecular Science, La Trobe University, Victoria, 3086, Australia.

4. Australian Synchrotron, 800 Blackburn Road, Clayton, Victoria, 3148, Australia.

\* Corresponding author: [e.robertson@latrobe.edu.au](mailto:e.robertson@latrobe.edu.au)

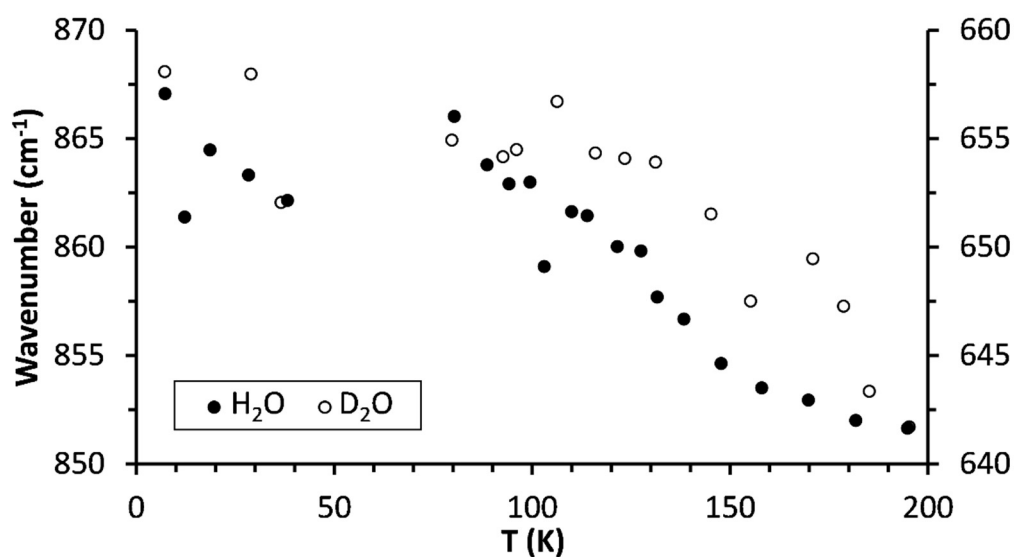

**Supplementary figure S1:** Comparison of the  $\nu_1$  position for near pure H<sub>2</sub>O and D<sub>2</sub>O crystalline particles.

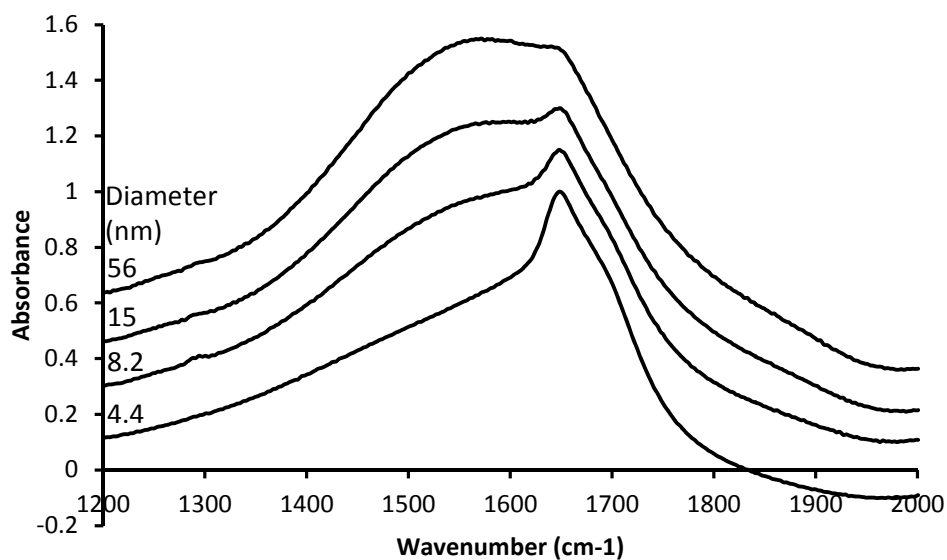

**Supplementary figure S2:** Changes in the shape of the  $2 \nu(\text{H}_2\text{O})$  band as a function of increasing particle size at 78 K.

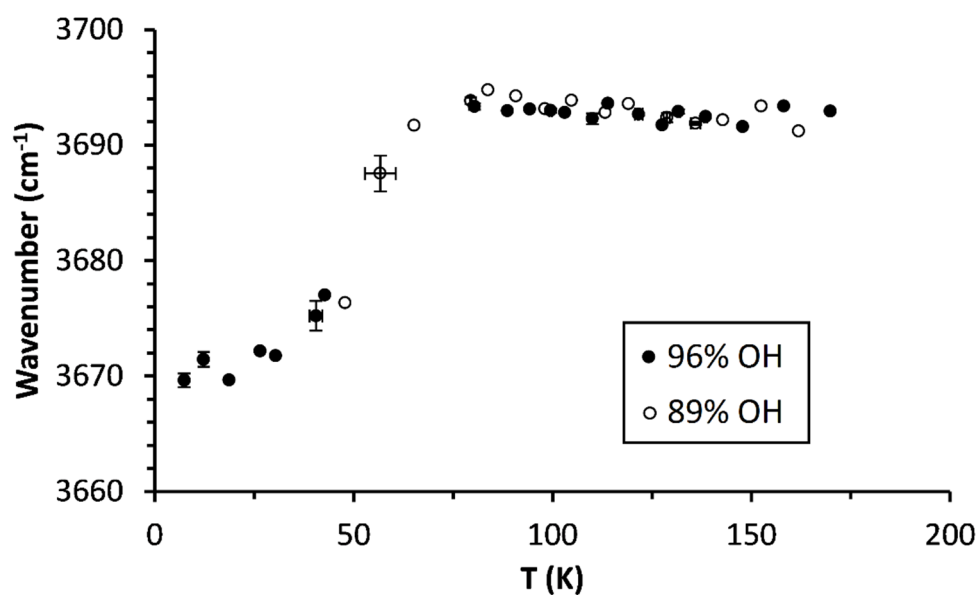

**Supplementary figure S3:** The COG peak position of the  $\text{dOH}(\text{H}_2\text{O})$  band at  $96 \pm 2\%$  OH (filled circles) and  $89 \pm 3\%$  OH (hollow circles).

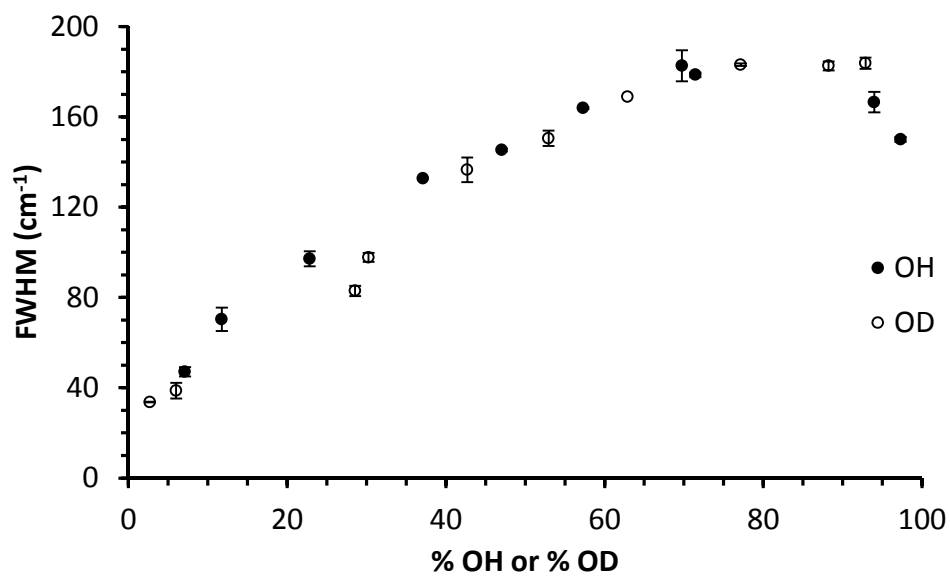

**Supplementary figure S4:** The FWHM of the OH and OD stretching bands as % OH (OD) is increased.

**Supplementary table S1a:** A more extensive list of literature values for the positions of vibrational bands for H<sub>2</sub>O.

| Reference     | Phase                                              | T (K) | $\nu_1, \nu_3$              | $\nu_2$ | $\nu_4$ | Dangling              | Lattice          |                 |
|---------------|----------------------------------------------------|-------|-----------------------------|---------|---------|-----------------------|------------------|-----------------|
|               |                                                    |       |                             |         |         | OH                    | TO               | LA              |
| Herzberg 1945 | Vapour                                             | --    | 3652/3756                   | 1595    | --      | --                    | --               | --              |
| Giguère 1956  | Cryst. Film                                        | 258   | --                          | 1650    | 800     | --                    | --               | --              |
|               |                                                    | 218   | 3240                        | 1650    | 820     | --                    | --               | --              |
|               |                                                    | 103   | 3250                        | --      | 850     | --                    | --               | --              |
| Hornig 1960   | Cryst. Film                                        | 78    | 3120/3360                   | 1585    | 847     | --                    | --               | --              |
| Bayly 1963    | Liquid                                             | †     | 3490                        | 1645    | --      | --                    | --               | --              |
| Whalley 1964  | Cryst. Film                                        | 100   | 3150/3220/3380              | 1650    | 900-840 | --                    | --               | --              |
| Ikawa 1968    | Vitreous film                                      | 113   | 3169/3241                   | --      | --      | --                    | --               | --              |
|               | Cryst. Film                                        | 163   | 3120/3206/3333              | --      | --      | --                    | --               | --              |
| Bonner 1969   | Liquid                                             | †     | 3530                        | 1645    | --      | --                    | --               | --              |
| Fox 1940      | Liquid                                             | †     | 3453                        | 1645    | --      | --                    | --               | --              |
| Bertie 1977   | Cryst. Film                                        | 78    | --                          | --      | --      | --                    | 233              | 230             |
| Hasted 1977   | LDA film                                           | 292   | --                          | --      | --      | --                    | 300 <sup>a</sup> | 80 <sup>a</sup> |
|               |                                                    | 77    | 3240/3381 <sup>b</sup>      | --      | --      | --                    | --               | --              |
|               |                                                    | 150   | 3156/3219/3371 <sup>b</sup> | --      | --      | --                    | --               | --              |
| Rice 1978     | Polycryst. Film                                    | 150   | 3146/3224/3359 <sup>a</sup> | --      | --      | --                    | --               | --              |
|               |                                                    | 150   | 3146/3224/3359 <sup>a</sup> | --      | --      | --                    | --               | --              |
| Devlin 1986   | Cryst. Film (H <sub>2</sub> O in D <sub>2</sub> O) | 90    | 3225/3270                   | 1735    | 840     | --                    | --               | --              |
|               |                                                    | 110   | 3257                        | --      | --      | --                    | --               | --              |
| Devlin 1989   | Aerosol                                            | 170   | 3252                        | --      | --      | --                    | --               | --              |
|               |                                                    | 80    | 3138/3228/3348              | --      | --      | --                    | --               | --              |
|               |                                                    | 15    | --                          | --      | --      | 3720 2cs <sup>c</sup> | --               | --              |
| Devlin 1991   | Amorph. Film                                       | 60    | --                          | --      | --      | 3696 3cs <sup>c</sup> | --               | --              |
|               |                                                    | 80    | --                          | --      | --      | 3692                  | --               | --              |
|               |                                                    | 80    | --                          | --      | --      | 3677                  | --               | --              |
| Devlin 1991   | Aerosol (in He)                                    | 80    | --                          | --      | --      | 3692                  | --               | --              |
|               |                                                    | 80    | --                          | --      | --      | 3677                  | --               | --              |
| Devlin 1991   | Aerosol (in N <sub>2</sub> )                       | 80    | --                          | --      | --      | 3692                  | --               | --              |
|               |                                                    | 80    | --                          | --      | --      | 3677                  | --               | --              |

|                 |                                                    |        |                |           |         |                        |     |     |
|-----------------|----------------------------------------------------|--------|----------------|-----------|---------|------------------------|-----|-----|
| Maréchal 1991   | Liquid                                             | 300    | 3405           | 1651      | 698     | --                     | --  | --  |
|                 |                                                    | 348    | 3437           | 1651      | 682     | --                     | --  | --  |
| Venyaminov 1997 | Liquid                                             | 298    | 3450/3600      | --        | --      | --                     | --  | --  |
| Buch 2001       | Cryst. Film                                        | 12     | --             | --        | 842     | --                     | --  | --  |
|                 | Aerosol (3 nm)                                     |        | --             | 1658      | 842     | --                     | --  | --  |
|                 | Amorph. film                                       |        | --             | 1671      | 770-810 | --                     | --  | --  |
|                 | Aerosol (12 nm)                                    | 100    | 3142/3255/3334 | --        | --      | 3676                   | --  | --  |
|                 | Aerosol (3,6,10,16,20 nm)                          |        | --             | 1650      | --      | --                     | --  | --  |
|                 | Cryst. Film                                        |        | --             | 1560      | --      | --                     | --  | --  |
| Everest 2001    | Cryst. Film                                        | 150    | 3225           | --        | 830     | --                     | --  | --  |
| Max 2002        | Liquid                                             | 298    | --             | 1638      | --      | --                     | --  | --  |
| Buch 2003       | Aerosol (12 nm with CF <sub>4</sub> )              | 80     | --             | --        | 868     | --                     | --  | --  |
|                 | Cryst. Film                                        |        | --             | --        | 842     | --                     | --  | --  |
|                 | Cryst. Film (H <sub>2</sub> O in D <sub>2</sub> O) | 90     | --             | --        | 817/735 | --                     | --  | --  |
| Raymond 2003    | Liquid (VSF <sup>d</sup> )                         | †      | --             | --        | --      | 3200-3400 <sup>e</sup> | --  | --  |
|                 |                                                    |        |                |           |         | 3703                   |     |     |
| Ceponkus 2004   | Matrix isolation (in Ne)                           | 2.8-10 | 3674, 3763     | 1616/1599 | --      | --                     | --  | --  |
| DeRose 2004     | Matrix isolation (in pH <sub>2</sub> )             | 2.4    | 3661, 3720     | 1612/1622 | --      | --                     | --  | --  |
| Dlott 2004      | Liquid (UNVS <sup>f</sup> )                        | †      | 3415           | 1650      | --      | --                     | --  | --  |
| Millo 2005      | Liquid                                             | 275    | 3311           | 1639      | --      | --                     | --  | --  |
|                 |                                                    | 271    | 3188           | 1623      | --      | --                     | --  | --  |
| Smith 2011      | Amorph. Film (on Pt(111))                          | 140    | 3332/3432      | --        | --      | --                     | --  | --  |
|                 | Cryst. Film (on Pt(111))                           |        | 3165/3309/3405 | --        | --      | --                     | --  | --  |
| Medcraft 2012   | Aerosol (in He)                                    | 5      | --             | --        | --      | --                     | 233 | 166 |

|               |                              |     |      |      |         |      |     |     |
|---------------|------------------------------|-----|------|------|---------|------|-----|-----|
|               | Aerosol (in N <sub>2</sub> ) | 200 | --   | --   | --      | --   | 225 | 157 |
| Medcraft 2013 | Aerosol (in He)              | 78  | 3223 | 1650 | ca. 850 | 3690 | --  | --  |
|               | Aerosol (in N <sub>2</sub> ) | 209 | 3253 | 1650 | 860     | --   | --  | --  |

† Assuming a temperature of 298 K.

<sup>a</sup> Determined using the imaginary component ( $k$ ) of refractive index

<sup>b</sup> Determined using the imaginary component of the dielectric constant  $\epsilon$  ( $=2nk$ ) from thin film data.

<sup>c</sup> 2cs and 3cs represents 2-co-ordinated and 3-co-ordinated surface molecules respectively.

<sup>d</sup> VSF = vibrational sum frequency

<sup>e</sup> free H<sub>2</sub>O rather than OH

<sup>f</sup> UNVS = ultrafast non-linear vibrational spectroscopy

## References

Herzberg 1945: G. Herzberg, *Molecular Spectra and Molecular Structure*, 281-282, Van Nostrand (1945).

Giguère 1956: P. A. Giguère and K. B. Harvey, *Can. J. Chem.*, **34**, 798 (1956)

Hornig 1960: C. Haas and D. F. Hornig, *J. Chem. Phys.*, **32**, 1763 (1960)

Bayly 1963: J. G. Bayly, B. Kartha and W. H. Stevens, *Infrared Phys.*, **3**, 211 (1963)

Whalley 1964: J. E. Bertie and E. Whalley, *J. Chem. Phys.*, **40**, 1637 (1964)

Ikawa 1967: S. -I. Ikawa and S. Maeda, *Spectrom. Acta*, **24A**, 655 (1968)

Bonner 1969: O. D. Bonner and J. D. Curry, *Infrared Phys.*, **10**, 91 (1969)

Fox 1940: J. J. Fox and A. E. Martin, *P. Roy. Soc. Lond. A. Mat.*, **174**, 234 (1940)

Bertie 1977: J. E. Bertie and S. M. Jacobs, *J. Chem. Phys.*, **67**, 2445 (1977)

Hasted 1977: M. N. Afsar and J. B. Hasted, *J. Opt. Soc. Am.*, **67**, 902 (1977)

Rice 1978: M. S. bergren, D. Schuh, M. G. Sceats and S. A. Rice, *J. Chem. Phys.*, **69**, 3477 (1978)

Devlin 1986: J. P. Devlin, P. J. Wooldridge and G. Ritzhaupt, *J. Chem. Phys.*, **84**, 6095 (1986)

Devlin 1989: J. P. Devlin, *J. Chem. Phys.*, **91**, 5850 (1989)

Devlin 1991: B. Rowland, M. Fisher and J. P. Devlin, *J. Chem. Phys.*, **95**, 1378 (1991)

Maréchal 1991: Y. Maréchal, *J. Chem. Phys.*, **95**, 5565 (1991)

Venyaminov 1997: S. Y. Venyaminov and F. G. Prendergast, *Anal. Biochem.*, **248**, 234 (1997)

Buch 2001: J. P. Devlin, J. Sadlej and V. Buch, *J. Phys. Chem. A*, **105**, 974 (2001)

Everest 2001: M. A. Everest and C. J. Pursell, *J. Chem. Phys.*, **115**, 9843 (2001)

Max 2002: J. –J. Max and C. Chapados, *J. Chem. Phys.*, **116**, 4626 (2002)

Buch 2003: M. W. Severson, J. P. Devlin and V. Buch, *J. Chem. Phys.*, **119**, 4449 (2003)

Raymond 2003: E. A. Raymond, T. L. Tarbuck, M. G. Brown and G. L. Richmond, *J. Phys. Chem. B*, **107**, 546 (2003)

Ceponkus 2004: J. Ceponkus and B. Nelander, *J. Phys. Chem. A*, **108**, 6499 (2004)

DeRose 2004: M. E. Fajardo, S. Tam and M. E. DeRose, *J. Mol. Struct.*, **695-696**, 111 (2004)

Dlott 2004: Z. Wang, A. Pakoulev, Y. Pang and D. D. Dlott, *J. Phys. Chem. A*, **108**, 9054 (2004)

Millo 2005: A. Millo, Y. Raichlin and A. Katzir, *Appl. Spectrosc.*, **59**, 460 (2005)

Smith 2011: R. S. Smith, J. Matthiesen, J. Knox and B. D. Kay, *J. Phys. Chem. A*, **115**, 5908 (2011)

Medcraft 2012: C. Medcraft, D. McNaughton, C. D. Thompson, D. Appadoo, S. Bauerecker and E. G. Robertson, *Astrophys. J.*, **758**, 1 (2012)

Medcraft 2013: C. Medcraft, D. McNaughton, C. D. Thompson, D. R. T. Appadoo, S. Bauerecker and E. G. Robertson, *Phys. Chem. Chem. Phys.*, **15**, 3630 (2013)

**Supplementary table S1b:** A more extensive list of literature values for the positions of vibrational bands for HOD.

| Reference    | Phase                                                  | T (K) | $\nu_1$        | $\nu_2$ | $\nu_3$        | $\nu_4$ | Dangling |    | Lattice |    |
|--------------|--------------------------------------------------------|-------|----------------|---------|----------------|---------|----------|----|---------|----|
|              |                                                        |       |                |         |                |         | OH       | OD | TO      | LA |
| Hornig 1960  | Cryst. Film (10% D <sub>2</sub> O in H <sub>2</sub> O) | 78    | 2416           | --      | --             | --      | --       | -- | --      | -- |
|              | Cryst. Film (50% HOD)                                  |       | --             | 1450    | --             | --      | --       | -- | --      | -- |
|              | Cryst. Film (52% HOD, 49% H <sub>2</sub> O)            |       | 2381           | 1477    | 3096/3192/3384 | 819     | --       | -- | --      | -- |
|              | Cryst. Film (50% HOD, 25% H <sub>2</sub> O)            |       | 2305/2388/2463 | 1449    | 3213/3192/3370 | --      | --       | -- | --      | -- |
|              | Cryst. Film (32% HOD, 4% H <sub>2</sub> O)             |       | 2326/2408/2453 | 1463    | 3240           | 805     | --       | -- | --      | -- |
|              | Cryst. Film (9.5% HOD, 90.25% H <sub>2</sub> O)        |       | 2415           | --      | --             | --      | --       | -- | --      | -- |
|              | Cryst. Film (18% HOD, 81% H <sub>2</sub> O)            |       | 2396/2417/2440 | --      | --             | --      | --       | -- | --      | -- |
|              | Cryst. Film (32% HOD, 64% H <sub>2</sub> O)            |       | 2400/2416/2444 | --      | --             | --      | --       | -- | --      | -- |
| Whalley 1964 | Cryst. Film (HDO in H <sub>2</sub> O)                  | 100   | 2395/2421/2445 | --      | --             | 515     | --       | -- | --      | -- |
|              | Cryst. Film (HDO in D <sub>2</sub> O)                  |       | --             | --      | 3277           | 822     | --       | -- | --      | -- |
| Ikawa 1967   | Vitreous film (HOD in 90.4% D <sub>2</sub> O)          | 113   | 2356           | --      | 3294           | --      | --       | -- | --      | -- |
|              | Cryst. Film (HOD in 3.8% D <sub>2</sub> O)             | 163   | 2334           | --      | 3263           | --      | --       | -- | --      | -- |
| Falk 1968    | Cryst. Film (0.3% HDO in H <sub>2</sub> O)             | 273   | 2445           | --      | 3330           | --      | --       | -- | --      | -- |
|              | Cryst. Film (0.3% HDO in D <sub>2</sub> O)             | 78    | 2416           | --      | 3260           | --      | --       | -- | --      | -- |
|              |                                                        | 257   | --             | --      | 3270           | --      | --       | -- | --      | -- |
| Clarke 1971  | Liquid                                                 | 283   | --             | --      | 3393           | --      | --       | -- | --      | -- |
|              |                                                        | 308   | --             | --      | 3413           | --      | --       | -- | --      | -- |
|              |                                                        | 333   | --             | --      | 3429           | --      | --       | -- | --      | -- |



|               |                                                          |     |                 |      |           |    |    |    |    |    |
|---------------|----------------------------------------------------------|-----|-----------------|------|-----------|----|----|----|----|----|
|               |                                                          | 358 | --              | --   | 3445      | -- | -- | -- | -- | -- |
| Rice 1978     | Polycryst. Film (0.5% in H <sub>2</sub> O)               |     | --              | --   | --        | -- | -- | -- | -- | -- |
|               | Amorph. Film (0.5% in H <sub>2</sub> O)                  | 70  | --              | --   | --        | -- | -- | -- | -- | -- |
|               | Polycryst. Film (0.5% in D <sub>2</sub> O)               |     | --              | --   | 3268      | -- | -- | -- | -- | -- |
|               | Amorph. Film (0.5% in D <sub>2</sub> O)                  |     | --              | --   | 3297      | -- | -- | -- | -- | -- |
| Devlin 1986   | Cryst. Film (30% (HOD) <sub>2</sub> in H <sub>2</sub> O) | 120 | --              | --   | 3238/3299 | -- | -- | -- | -- | -- |
|               | Cryst. Film (30% (HOD) <sub>2</sub> in D <sub>2</sub> O) |     | 2396/2439       | --   | --        | -- | -- | -- | -- | -- |
|               | Cryst. Film (30% HOD in H <sub>2</sub> O)                | 90  | --              | 1490 | 3270      | -- | -- | -- | -- | -- |
|               | Cryst. Film (30% HOD in D <sub>2</sub> O)                |     | 2417            | 1510 | --        | -- | -- | -- | -- | -- |
| Devlin 1988   | Polycryst. Film ((HOD) <sub>2</sub> in H <sub>2</sub> O) | 90  | 2442/2400       | --   | --        | -- | -- | -- | -- | -- |
|               | Polycryst. Film (HOD in H <sub>2</sub> O)                |     | 2420            | --   | --        | -- | -- | -- | -- | -- |
| Marechal 1991 | Liquid (50% H to 50% D)                                  |     | 2493            | 1457 | 3391      | -- | -- | -- | -- | -- |
|               | Liquid (90% H to 10% D)                                  | 298 | 2499            | 1457 | 3377      | -- | -- | -- | -- | -- |
|               | Liquid (10% H to 90% D)                                  |     | 2471            | 1457 | 3390      | -- | -- | -- | -- | -- |
| Horn 1992     | (Amorph.) Film (HOD in D <sub>2</sub> O on Pt(111))      | 110 | --              | --   | 3315      | -- | -- | -- | -- | -- |
| Hage 1995     | Cryst. Film (12% HOD in D <sub>2</sub> O) 0 min          | 150 | --              | --   | 3285      | -- | -- | -- | -- | -- |
|               | Cryst. Film (12% HOD in D <sub>2</sub> O) 49 min         |     | --              | --   | 3276      | -- | -- | -- | -- | -- |
| Toth 1999     | Vapour                                                   | --  | 2724            | 1403 | 3703      | -- | -- | -- | -- | -- |
| Buch 2000     | Aerosol (18% HOD in H <sub>2</sub> O 40 nm)              | 100 | 2389/2419/2439  | --   | --        | -- | -- | -- | -- | -- |
|               | Aerosol (18% HOD in H <sub>2</sub> O 4, 6, 7, 8 nm)      |     | 2415 (sub-surf) | --   | --        | -- | -- | -- | -- | -- |

|                |                                                                                    |     |                  |      |           |         |           |    |    |    |
|----------------|------------------------------------------------------------------------------------|-----|------------------|------|-----------|---------|-----------|----|----|----|
|                | Aerosol (18% HOD in H <sub>2</sub> O 4, 6, 7, 8 nm)                                |     | 2396/2450 (surf) | --   | --        | --      | --        | -- | -- | -- |
| Buch 2001      | Aerosol (50% H to 50%D 8 nm)                                                       | 100 | --               | 1215 | --        | --      | --        | -- | -- | -- |
|                | Aerosol (18% HOD in H <sub>2</sub> O)                                              |     | --               | 1455 | --        | --      | --        | -- | -- | -- |
|                | Liquid                                                                             |     | --               | 1469 | --        | --      | --        | -- | -- | -- |
| Max 2002       | Liquid (29.8% D <sub>2</sub> O and 25.6% H <sub>2</sub> O)                         | 298 | --               | 1446 | --        | --      | --        | -- | -- | -- |
|                | Liquid ('pure' HOD)                                                                |     | 2485             | 1439 | 3370      | --      | --        | -- | -- | -- |
|                | Aerosol in He (HOD in H <sub>2</sub> O 12 nm)                                      | 80  | --               | --   | --        | 506/515 | --        | -- | -- | -- |
| Buch 2003      | Aerosol in He (HOD in D <sub>2</sub> O 12 nm)                                      |     | --               | --   | --        | 824/850 | --        | -- | -- | -- |
| Raymond 2003   | Liquid (VSF <sup>a</sup> 0.02mf HOD, 0.25mf H <sub>2</sub> O)                      | †   | --               | --   | 3200      | --      | 3100-3450 | -- | -- | -- |
| Derose 2004    | Matrix isolation (in <i>p</i> H <sub>2</sub> )                                     | 2.4 | 2730             | 1417 | 3710/3723 | --      | --        | -- | -- | -- |
|                | Liquid (UNVS <sup>b</sup> ) HOD in D <sub>2</sub> O laser at 3180 cm <sup>-1</sup> |     | 2400/2514        | 1429 | 3393/3629 | --      | --        | -- | -- | -- |
| Dlott 2004     | Liquid (UNVS <sup>b</sup> ) HOD in D <sub>2</sub> O laser at 3550 cm <sup>-1</sup> | †   | 2518/2371        | --   | 3457      | --      | --        | -- | -- | -- |
|                | Liquid (UNVS <sup>b</sup> ) HOD in D <sub>2</sub> O laser at 3380 cm <sup>-1</sup> |     | 2530             | --   | 3455      | --      | --        | -- | -- | -- |
| Schwarzer 2006 | Liquid (2% HOD in D <sub>2</sub> O)                                                | 296 | --               | --   | 3404      | --      | --        | -- | -- | -- |
|                |                                                                                    | 398 | --               | --   | 3470      | --      | --        | -- | -- | -- |
| Hamm 2011      | Cryst. Film (HOD in D <sub>2</sub> O)                                              | 80  | 2425             | --   | 3272      | --      | --        | -- | -- | -- |
| Hamm 2013      | Amorph. Film (HOD in D <sub>2</sub> O)                                             | 80  | 2447             | --   | 3290      | --      | --        | -- | -- | -- |

† Assuming a temperature of 298 K.

<sup>a</sup> VSF = vibrational sum frequency

<sup>b</sup> UNVS = ultrafast non-linear vibrational spectroscopy

## References:

- Hornig 1960: C. Haas and D. F. Hornig, *J. Chem. Phys.*, **32**, 1763 (1960)
- Whalley 1964: J. E. Bertie and E. Whalley, *J. Chem. Phys.*, **40**, 1637 (1964)
- Ikawa 1967: S. -I. Ikawa and S. Maeda, *Spectrom. Acta*, **24A**, 655 (1968)
- Falk 1968: T. A. Ford and M. Falk, *Can. J. Chem.*, **46**, 3579 (1968)
- Clarke 1971: E. C. W. Clarke and D. N. Glew, *Can. J. Chem.*, **50**, 1655 (1972)
- Rice 1978: M. S. bergren, D. Schuh, M. G. Sceats and S. A. Rice, *J. Chem. Phys.*, **69**, 3477 (1978)
- Devlin 1986: J. P. Devlin, P. J. Wooldridge and G. Ritzhaupt, *J. Chem. Phys.*, **84**, 6095 (1986)
- Devlin 1988: P. J. Wooldridge and J. P. Devlin, *J. Chem. Phys.*, **88**, 3086 (1988)
- Maréchal 1991: Y. Maréchal, *J. Chem. Phys.*, **95**, 5565 (1991)
- Horn 1992: A. B. Horn, M. A. Chesters, M. R. S. McCoustra and J. R. Sodeau, *J. Chem. Soc. Faraday Trans.*, **88**, 1077 (1992)
- Hage 1995: W. Hage, A. Hallbucker, E. Mayer and G. P. Johari, *J. Chem. Phys.*, **103**, 545 (1995)
- Toth 1999: R. A. Toth, *J. Mol. Spectrosc.*, **195**, 73 (1999)
- Buch 2000: J. P. Devlin, C. Joyce and V. Buch, *J. Phys. Chem. A*, **104**, 1974 (2000)
- Buch 2001: J. P. Devlin, J. Sadlej and V. Buch, *J. Phys. Chem. A*, **105**, 974 (2001)
- Max 2002: J. -J. Max and C. Chapados, *J. Chem. Phys.*, **116**, 4626 (2002)
- Buch 2003: M. W. Severson, J. P. Devlin and V. Buch, *J. Chem. Phys.*, **119**, 4449 (2003)
- Raymond 2003: E. A. Raymond, T. L. Tarbuck, M. G. Brown and G. L. Richmond, *J. Phys. Chem. B*, **107**, 546 (2003)
- DeRose 2004: M. E. Fajardo, S. Tam and M. E. DeRose, *J. Mol. Struct.*, **695-696**, 111 (2004)
- Dlott 2004: Z. Wang, A. Pakoulev, Y. Pang and D. D. Dlott, *J. Phys. Chem. A*, **108**, 9054 (2004)
- Schwartz 2006: D. Schwarzer, J. Linder and P. Vöhringer, *J. Phys. Chem. A*, **110**, 2858 (2006)
- Hamm 2011: F. Perakis, S. Widmer and P. Hamm, *J. Chem. Phys.*, **134**, 204505 (2011)
- Hamm 2013: F. Perakis, J. A. Borek and P. Hamm, *J. Chem. Phys.*, **139**, 014501 (2013)

**Supplementary table S1c:** A more extensive list of literature values for the positions of vibrational bands for D<sub>2</sub>O.

| Reference    | Phase                                                  | T (K) | $\nu_1, \nu_3$              | $\nu_2$                     | $\nu_L$               | Dangling OD           | Lattice TO | LA |
|--------------|--------------------------------------------------------|-------|-----------------------------|-----------------------------|-----------------------|-----------------------|------------|----|
| Giguère 1956 | Liquid                                                 | 283   | --                          | --                          | 530                   | --                    | --         | -- |
|              |                                                        | 258   | --                          | --                          | 590                   | --                    | --         | -- |
|              | Cryst. Film                                            | 218   | 2400                        | 1210                        | 610                   | --                    | --         | -- |
|              |                                                        | 103   | 2450                        | 1210                        | 630                   | --                    | --         | -- |
| Hornig 1960  | Cryst. Film (5% HOD in 95% D <sub>2</sub> O)           | 78    | 2326/2408/2463              | 1210                        | --                    | --                    | --         | -- |
| Whalley 1964 | Cryst. Film                                            | 110   | 2332/2425/2545              | 1210                        | 640-675               | --                    | --         | -- |
| Ikawa 1967   | Vitreous film (90.4% D <sub>2</sub> O)                 | 113   | 2354/2433/2517              | --                          | 590                   | --                    | --         | -- |
|              | Cryst. Film (90.4% D <sub>2</sub> O)                   | 163   | 2319/2417/2472              | --                          | 627                   | --                    | --         | -- |
| Bonner 1969  | Liquid                                                 | †     | 2625                        | 1210                        | --                    | --                    | --         | -- |
| Bertie 1977  | Cryst. Film                                            | 78    | --                          | --                          | --                    | --                    | 227        | -- |
| Rice 1978    | LDA film                                               | 70    | 2367/2435/2490 <sup>a</sup> | --                          | --                    | --                    | --         | -- |
|              | Polycryst. Film                                        | 150   | 2338/2424/2481 <sup>b</sup> | --                          | --                    | --                    | --         | -- |
|              |                                                        |       |                             | 2331/2423/2480 <sup>a</sup> | --                    | --                    | --         | -- |
| Devlin 1986  | Cryst. Film (2% D <sub>2</sub> O in H <sub>2</sub> O)  | 90    | 2444/2366                   | 1225                        | 640                   | --                    | --         | -- |
| Devlin 1988  | Polycryst. Film (D <sub>2</sub> O in H <sub>2</sub> O) | 90    | 2400/2421/2442              | --                          | --                    | --                    | --         | -- |
|              |                                                        | 38    | 2325/2420/2485              | --                          | --                    | --                    | --         | -- |
| Devlin 1989  | Aerosol                                                | 80    | 2366/2441                   | --                          | --                    | --                    | --         | -- |
|              |                                                        | 170   | 2438/2500                   | --                          | --                    | --                    | --         | -- |
|              |                                                        | 80    | 2339/2428/2461              | --                          | --                    | --                    | --         | -- |
|              | Aerosol (with H <sub>2</sub> O)                        | 90    | 2342, 2426                  | --                          | --                    | --                    | --         | -- |
| Devlin 1991  | Amorph. Film                                           | 15    | --                          | --                          | --                    | 2748 2cs <sup>c</sup> | --         | -- |
|              |                                                        |       | --                          | --                          | --                    | 2727 3cs <sup>c</sup> | --         | -- |
|              | Amorph. Film (in He)                                   | --    | --                          | --                          | 2749 2cs <sup>c</sup> | --                    | --         |    |
|              |                                                        | --    | --                          | --                          | 2729 3cs <sup>c</sup> | --                    | --         |    |

|                  |                                                                   |           |                |      |             |                       |    |    |
|------------------|-------------------------------------------------------------------|-----------|----------------|------|-------------|-----------------------|----|----|
|                  | Amorph. Film (in N <sub>2</sub> )                                 |           | --             | --   | --          | 2725 2cs <sup>c</sup> | -- | -- |
|                  |                                                                   |           | --             | --   | --          | 2707 3cs <sup>c</sup> | -- | -- |
|                  | Amorph. Film (post annealing)                                     | 60        | --             | --   | --          | 2727 3cs <sup>c</sup> | -- | -- |
| Maréchal<br>1991 | Liquid                                                            | 300       | 2397/2468/2548 | 1190 | --          | --                    | -- | -- |
|                  |                                                                   | 348       | 2405/2500/2595 | 1190 | --          | --                    | -- | -- |
| Bowman<br>1996   | Supercrit (Xe)                                                    | 383       | 2766           | --   | --          | --                    | -- | -- |
|                  | Supercrit (CO <sub>2</sub> )                                      |           |                | --   | --          | --                    | -- | -- |
|                  | Cryst. Film                                                       | 110       | 2524           | 1214 | --          | 2728                  | -- | -- |
| Horn 1992        | Cryst. Film with CF <sub>2</sub> Cl <sub>2</sub>                  | --        | --             | --   | --          | 2708                  | -- | -- |
|                  | Cryst. Film with CCl <sub>3</sub> F                               | --        | --             | --   | --          | 2702                  | -- | -- |
|                  | Cryst. Film with CCl <sub>4</sub>                                 | --        | --             | --   | --          | 2695                  | -- | -- |
| Paul 1998        | Vapour (D <sub>2</sub> O) <sub>2</sub>                            | 5         | 2783           | --   | --          | --                    | -- | -- |
| Toth 1999        | Vapour                                                            | --        | 2672, 2788     | 1178 | --          | --                    | -- | -- |
| Buch 2000        | Amorph. Film                                                      | 80        | 2370/2459/2519 | --   | --          | --                    | -- | -- |
|                  | Aerosol (16 nm)                                                   | 100       | 2300/2430/2490 | --   | --          | --                    | -- | -- |
| Devlin 2000      | Nanocryst.                                                        | 136       | --             | --   | --          | 2725                  | -- | -- |
| Buch 2001        | Aerosol (20 nm with CF <sub>4</sub> )                             | 100       | 2310/2395/2515 | --   | --          | --                    | -- | -- |
|                  | Aerosol (8 nm)                                                    |           | --             | 1211 | --          | --                    | -- | -- |
| Everest 2001     | Cryst. Film (D <sub>2</sub> O on H <sub>2</sub> O)                | 145       | 2425           | --   | --          | --                    | -- | -- |
|                  | Cryst. Film (D <sub>2</sub> O on H <sub>2</sub> O doped with HCl) |           | 2419           | --   | --          | --                    | -- | -- |
| Max 2002         | Liquid (54.5% D <sub>2</sub> O)                                   | 298       | 2423/2484      | 1200 | --          | --                    | -- | -- |
|                  | Liquid ('pure' D <sub>2</sub> O)                                  |           | --             | 1214 | --          | --                    | -- | -- |
| Buch 2003        | Cryst. Film                                                       |           | --             | --   | 633/661     | --                    | -- | -- |
|                  | Aerosol (12 nm)                                                   | 90        | --             | --   | 628/663     | --                    | -- | -- |
|                  | Aerosol (12 nm isolated in H <sub>2</sub> O)                      |           | --             | --   | 453/504/525 | --                    | -- | -- |
| Ceponus<br>2004  | Matrix isolation ((D <sub>2</sub> O) <sub>2</sub> in Ne)          | 2.8 to 10 | 2672, 2785     | 1182 | --          | --                    | -- | -- |

|               |                                                                                    |     |            |      |     |    |     |    |
|---------------|------------------------------------------------------------------------------------|-----|------------|------|-----|----|-----|----|
| DeRose 2004   | Matrix isolation (in pHz)                                                          | 2.4 | 2673, 2766 | 1188 | --  | -- | --  | -- |
|               | Liquid (UNVS <sup>d</sup> ) HOD in D <sub>2</sub> O laser at 3180 cm <sup>-1</sup> |     | 2400/2514  | 1350 | --  | -- | --  | -- |
| Dlott 2004    | Liquid (UNVS <sup>d</sup> ) HOD in D <sub>2</sub> O laser at 3550 cm <sup>-1</sup> | †   | 2900/2371  | --   | --  | -- | --  | -- |
|               | Liquid (UNVS <sup>d</sup> ) HOD in D <sub>2</sub> O laser at 3380 cm <sup>-1</sup> |     | 2530       | --   | --  | -- | --  | -- |
| Millo 2005    | Liquid                                                                             | 278 | 2375/2475  | 1217 | --  | -- | --  | -- |
|               | Cryst. Film                                                                        | 275 | 2417       | 1217 | --  | -- | --  | -- |
| Zasetsky 2007 | Liquid                                                                             | †   | --         | --   | 520 | -- | 200 | -- |

† Assuming a temperature of 298 K.

<sup>a</sup> Determined using the imaginary component of the dielectric constant  $\epsilon$  ( $=2nk$ ) from thin film data.

<sup>b</sup> Determined using the imaginary component ( $k$ ) of refractive index.

<sup>c</sup> 2cs and 3cs represents 2-co-ordinated and 3-co-ordinated surface molecules respectively.

<sup>d</sup> UNVS = ultrafast non-linear vibrational spectroscopy.

## References:

- Giguère 1956: P. A. Giguère and K. B. Harvey, *Can. J. Chem.*, **34**, 798 (1956)
- Hornig 1960: C. Haas and D. F. Hornig, *J. Chem. Phys.*, **32**, 1763 (1960)
- Whalley 1964: J. E. Bertie and E. Whalley, *J. Chem. Phys.*, **40**, 1637 (1964)
- Ikawa 1967: S. -I. Ikawa and S. Maeda, *Spectrom. Acta*, **24A**, 655 (1968)
- Bonner 1969: O. D. Bonner and J. D. Curry, *Infrared Phys.*, **10**, 91 (1969)
- Bertie 1977: J. E. Bertie and S. M. Jacobs, *J. Chem. Phys.*, **67**, 2445 (1977)
- Rice 1978: M. S. bergren, D. Schuh, M. G. Sceats and S. A. Rice, *J. Chem. Phys.*, **69**, 3477 (1978)
- Devlin 1986: J. P. Devlin, P. J. Wooldridge and G. Ritzhaupt, *J. Chem. Phys.*, **84**, 6095 (1986)
- Devlin 1988: P. J. Wooldridge and J. P. Devlin, *J. Chem. Phys.*, **88**, 3086 (1988)
- Devlin 1989: J. P. Devlin, *J. Chem. Phys.*, **91**, 5850 (1989)
- Devlin 1991: B. Rowland, M. Fisher and J. P. Devlin, *J. Chem. Phys.*, **95**, 1378 (1991)
- Maréchal 1991: Y. Maréchal, *J. Chem. Phys.*, **95**, 5565 (1991)

Bowman 1996: L. E. Bowman, B. J. Palmer, B. C. Garrett, J. L. Fulton, C. R. Yonker, D. M. Pfund and S. L. Wallen, *J. Phys. Chem.*, **100**, 18327 (1996)

Horn 1992: A. B. Horn, M. A. Chesters, M. R. S. McCoustra and J. R. Sodeau, *J. Chem. Soc. Faraday*

Paul 1998: J. B. Paul, R. A. Provencal and R. J. Saykally, *J. Phys. Chem. A*, **102**, 3279 (1998)

Toth 1999: R. A. Toth, *J. Mol. Spectrosc.*, **195**, 98 (1999)

Buch 2000: J. P. Devlin, C. Joyce and V. Buch, *J. Phys. Chem. A*, **104**, 1974 (2000)

Devlin 2000: J. P. Devlin, *J. Chem. Phys.*, **112**, 5527 (2000)

Buch 2001: J. P. Devlin, J. Sadlej and V. Buch, *J. Phys. Chem. A*, **105**, 974 (2001)

Everest 2001: M. A. Everest and C. J. Pursell, *J. Chem. Phys.*, **115**, 9843 (2001)

Max 2002: J. –J. Max and C. Chapados, *J. Chem. Phys.*, **116**, 4626 (2002)

Buch 2003: M. W. Severson, J. P. Devlin and V. Buch, *J. Chem. Phys.*, **119**, 4449 (2003)

Ceponkus 2004: J. Ceponkus and B. Nelander, *J. Phys. Chem. A*, **108**, 6499 (2004)

DeRose 2004: M. E. Fajardo, S. Tam and M. E. DeRose, *J. Mol. Struct.*, **695-696**, 111 (2004)

Dlott 2004: Z. Wang, A. Pakoulev, Y. Pang and D. D. Dlott, *J. Phys. Chem. A*, **108**, 9054 (2004)

Millo 2005: A. Millo, Y. Raichlin and A. Katzir, *Appl. Spectrosc.*, **59**, 460 (2005)

Zasetsky 2007: A. Y. Zasetsky and V. I. Gaiduk, *J. Phys. Chem. A.*, **111**, 5599 (2007)

**Supplementary table S2a:** Positions of overtone and combination bands involving the  $\nu_2$ ,  $\nu_L$ , TO and LA modes at 7 K.

| Species                     | H <sub>2</sub> O |      |      | HOD              |      |      |      |      | D <sub>2</sub> O |      |      |
|-----------------------------|------------------|------|------|------------------|------|------|------|------|------------------|------|------|
|                             | % OH             | 94   | 81   | 47               | 94   | 81   | 47   | 28   | 3                | 47   | 28   |
| Vibrational mode            |                  |      |      |                  |      |      |      |      |                  |      |      |
| TO                          | 235 <sup>a</sup> |      |      | 230 (78K)        |      |      |      |      | 227 (78K)        |      |      |
| LA                          | 166 <sup>a</sup> |      |      | 162 (78K)        |      |      |      |      | 161 (78K)        |      |      |
| $\nu_L$ in H <sub>2</sub> O | 863              | 846  |      | 515 <sup>b</sup> |      |      |      |      | 525 <sup>b</sup> |      |      |
| $\nu_L$ in D <sub>2</sub> O | --               | --   | --   | --               | --   | 822  | 822  | 828  | 646              | 654  | 657  |
| $\nu_2$ (surf)              | 1653             | 1654 | 1655 | --               | 1493 | 1495 | --   | --   | --               | --   | --   |
| $\nu_2$                     | --               | --   | --   | --               | 3224 | 3248 | --   | --   | --               | --   | --   |
| $\nu_{OH}$                  | 3218             | 3224 | 3248 | --               | 2414 | --   | 3263 | 3263 | --               | --   | --   |
| $\nu_{OD}$                  | --               | --   | --   | 2412             | --   | 2423 | 2426 | --   | 2423             | 2426 | 2421 |
| d <sub>OH</sub>             | --               | 3673 | --   | --               | --   | --   | --   | --   | --               | --   | --   |
| d <sub>OD</sub>             | 3668             | --   | --   | --               | --   | 2705 | --   | --   | 2705             | 2710 | 2710 |
| 2 $\nu_2$                   | --               | --   | --   | --               | --   | --   | --   | --   | --               | --   | --   |
| 2 $\nu_L$                   | 1573             | 1572 | 1583 | --               | --   | --   | 1620 | 1634 | 1214             | 1215 | --   |
| 3 $\nu_L$                   | 2250?            | --   | --   | --               | 1984 | --   | 1499 | --   | --               | --   | --   |
| $\nu_2 + \nu_L$             | --               | --   | --   | 2250?            | --   | --   | --   | --   | --               | --   | --   |

<sup>a</sup> C. Medcraft, D. McNaughton, C. D. Thompson, D. R. T. Appadoo, S. Bauerecker and E. G. Robertson, *Phys. Chem. Chem. Phys.*, **15**, 3630 (2013)

<sup>b</sup> Buch 2003: M. W. Severson, J. P. Devlin and V. Buch, *J. Chem. Phys.*, **119**, 4449 (2003)



**Supplementary table S2b:** Positions of overtone and combination bands involving the  $\nu_2$ ,  $\nu_L$ , TO and LA modes at 78 K.

| Species                     | H <sub>2</sub> O |       |       |      |      | HOD              |       |       |       |      |       |      |      |   |
|-----------------------------|------------------|-------|-------|------|------|------------------|-------|-------|-------|------|-------|------|------|---|
|                             | % OH             | 94-97 | 70-71 | 57   | 47   | 37               | 94-97 | 70-71 | 57    | 47   | 37    | 23   | 12   | 7 |
| Vibrational mode            |                  |       |       |      |      |                  |       |       |       |      |       |      |      |   |
| TO                          | 233 <sup>a</sup> |       |       |      |      | 230 (78K)        |       |       |       |      |       |      |      |   |
| LA                          | 165 <sup>a</sup> |       |       |      |      | 162 (78K)        |       |       |       |      |       |      |      |   |
| $\nu_L$ in H <sub>2</sub> O | 861              | 845   | --    | --   | --   | 515 <sup>b</sup> |       |       |       |      |       |      |      |   |
| $\nu_L$ in D <sub>2</sub> O | --               | --    | --    | --   | --   | --               | --    | 817   | 818   | 818  | 820   | 822  | 823  |   |
| $\nu_2$ (surf)              | 1648             | 1650  | 1656  | 1649 | --   | --               | --    | --    | --    | --   | --    | --   | --   |   |
| $\nu_2$                     | --               | --    | --    | --   | --   | --               | 1493  | 1494  | 1496  | 1500 | 1508  | 1513 | 1517 |   |
| $\nu_{OH}$                  | 3227             | 3235  | 3247  | --   | --   | --               | --    | --    | 3264  | 3266 | 3269  | 3269 | 3269 |   |
| $\nu_{OD}$                  | --               | --    | --    | --   | --   | 2416             | 2418  | 2426  | 2431  | 2430 | --    | --   | --   |   |
| $d_{OH}$                    | 3691             | 3691  | 3692  | 3693 | 3692 | --               | --    | --    | 3683? | --   | 3688  | --   | --   |   |
| $d_{OD}$                    | --               | --    | --    | --   | --   | --               | --    | 2715  | 2714  | 2727 | --    | --   | --   |   |
| $2\nu_2$                    | --               | --    | --    | --   | --   | --               | --    | --    | --    | --   | --    | --   | --   |   |
| $2\nu_L$                    | 1570             | 1571  | 1573  | 1570 | 1600 | --               | --    | --    | --    | --   | 1633? | 1632 | 1633 |   |
| $3\nu_L$                    | 2252             | --    | --    | --   | --   | --               | --    | --    | --    | --   | --    | --   | --   |   |
| $\nu_2+\nu_L$               | --               | --    | --    | --   | --   | 2252?            | 1963  | 1966  | 1957  | 1965 | --    | --   | --   |   |
| $\nu_2+2\nu_L$              | --               | --    | --    | --   | --   | --               | --    | --    | --    | --   | --    | --   | --   |   |
| $\nu_{OH}+TO$               | --               | --    | --    | --   | --   | --               | --    | --    | --    | --   | --    | 3473 | 3473 |   |

<sup>a</sup> C. Medcraft, D. McNaughton, C. D. Thompson, D. R. T. Appadoo, S. Bauerecker and E. G. Robertson, *Phys. Chem. Chem. Phys.*, **15**, 3630 (2013)

<sup>b</sup> Buch 2003: M. W. Severson, J. P. Devlin and V. Buch, *J. Chem. Phys.*, **119**, 4449 (2003)

**Supplementary table S2b cont:** Positions of overtone and combination bands involving the  $\nu_2$ ,  $\nu_L$ , TO and LA modes at 78 K.

| Species                     | D <sub>2</sub> O |       |      |      |       |      |      |
|-----------------------------|------------------|-------|------|------|-------|------|------|
|                             | % OH             | 70-71 | 57   | 47   | 37    | 23   | 12   |
| Vibrational mode            |                  |       |      |      |       |      |      |
| TO                          | 227 (78K)        |       |      |      |       |      |      |
| LA                          | 161 (78K)        |       |      |      |       |      |      |
| $\nu_L$ in H <sub>2</sub> O | 525 <sup>a</sup> |       |      |      |       |      |      |
| $\nu_L$ in D <sub>2</sub> O | --               | --    | --   | --   | --    | --   | 658  |
| $\nu_2$ (surf)              | --               | --    | --   | --   | --    | --   | --   |
| $\nu_2$                     | --               | --    | --   | --   | --    | --   | --   |
| $\nu_{OH}$                  | --               | --    | --   | --   | --    | --   | --   |
| $\nu_{OD}$                  | --               | --    | --   | --   | 2432  | 2428 | 2427 |
| $d_{OH}$                    | --               | --    | --   | --   | --    | --   | --   |
| $d_{OD}$                    | --               | 2725  | 2726 | 2726 | 2726  | 2726 | 2726 |
| 2 $\nu_2$                   | --               | --    | --   | --   | --    | --   | --   |
| 2 $\nu_L$                   | 1225             | --    | 1217 | 1213 | 1210  | 1211 | 1211 |
| 3 $\nu_L$                   | --               | --    | --   | --   | 1633? | 1632 | 1633 |
| $\nu_2 + \nu_L$             | --               | --    | --   | --   | --    | --   | --   |
| $\nu_2 + 2 \nu_L$           | --               | --    | --   | --   | --    | --   | --   |
| $\nu_{OH} + TO$             | --               | --    | --   | --   | --    | --   | --   |

<sup>a</sup> Buch 2003: M. W. Severson, J. P. Devlin and V. Buch, *J. Chem. Phys.*, **119**, 4449 (2003)

**Supplementary table S2c:** Positions of overtone and combination bands involving the  $\nu_2$ ,  $\nu_L$ , TO and LA modes at 140 K.

| Species                     | H <sub>2</sub> O |      |      |       |      | HOD              |      |      |       |       |       |       |       |   |
|-----------------------------|------------------|------|------|-------|------|------------------|------|------|-------|-------|-------|-------|-------|---|
|                             | % OH             | 97   | 77   | 60-65 | 55   | 47               | 97   | 77   | 60-65 | 55    | 47    | 26    | 12-15 | 7 |
| Vibrational mode            |                  |      |      |       |      |                  |      |      |       |       |       |       |       |   |
| TO                          | 228 <sup>a</sup> |      |      |       |      | 230 (78K)        |      |      |       |       |       |       |       |   |
| LA                          | 162 <sup>a</sup> |      |      |       |      | 162 (78K)        |      |      |       |       |       |       |       |   |
| $\nu_L$ in H <sub>2</sub> O | 854              | 834  | 811  | --    | --   | 515 <sup>b</sup> |      |      |       |       |       |       |       |   |
| $\nu_L$ in D <sub>2</sub> O | --               | --   | --   | --    | --   | 822              | 822  | 822  | 812   | 813   | 813   | 814   | 814   |   |
| $\nu_2$ (surf)              | --               | 1644 | --   | --    | --   | --               | --   | --   | --    | --    | --    | --    | --    |   |
| $\nu_2$                     | --               | --   | --   | --    | --   | --               | 1490 | 1493 | 1493  | 1498  | 1499  | 1506  | --    |   |
| $\nu_{OH}$                  | 3236             | 3245 | 3257 | --    | --   | --               | --   | --   | 3263  | 3273  | 3278  | 3278  | 3277  |   |
| $\nu_{OD}$                  | --               | --   | --   | --    | --   | 2423             | 2424 | 2430 | 2430  | --    | --    | --    | --    |   |
| $d_{OH}$                    | 3693             | 3691 | 3692 | 3692  | --   | --               | --   | --   | 3683  | 3690  | 3689  | --    | --    |   |
| $d_{OD}$                    | --               | --   | --   | --    | --   | --               | --   | --   | --    | 2711  | --    | --    | --    |   |
| $2\nu_2$                    | --               | --   | --   | --    | --   | --               | --   | --   | --    | 2930? | 2900? | 2868? | --    |   |
| $2\nu_L$                    | 1567             | 1584 | 1571 | 1571  | 1574 | --               | --   | --   | --    | --    | 1634  | 1629  | 1628  |   |
| $3\nu_L$                    | 2251             | --   | --   | --    | --   | --               | --   | --   | --    | --    | --    | --    | --    |   |
| $\nu_2+\nu_L$               | --               | --   | --   | --    | --   | --               | 1958 | 1960 | 1964  | 1953  | 1923  | --    | --    |   |
| $\nu_2+2\nu_L$              | --               | --   | --   | --    | --   | --               | --   | --   | --    | --    | --    | --    | --    |   |
| $\nu_L+TO$                  | 1118?            | --   | --   | --    | --   | --               | --   | --   | --    | --    | --    | --    | --    |   |
| $\nu_{OH}+TO$               | --               | --   | --   | --    | --   | --               | --   | --   | --    | --    | --    | --    | --    |   |
| $\nu_{OH}+LA/TO$            | --               | --   | --   | --    | --   | --               | --   | --   | --    | --    | --    | 3448? | 3466? |   |

<sup>a</sup> C. Medcraft, D. McNaughton, C. D. Thompson, D. R. T. Appadoo, S. Bauerecker and E. G. Robertson, *Phys. Chem. Chem. Phys.*, **15**, 3630 (2013)

<sup>b</sup> Buch 2003: M. W. Severson, J. P. Devlin and V. Buch, *J. Chem. Phys.*, **119**, 4449 (2003)

**Supplementary table S2c cont:** Positions of overtone and combination bands involving the  $\nu_2$ ,  $\nu_L$ , TO and LA modes at 140 K.

| Species                     | D <sub>2</sub> O |      |       |                  |      |      |       |    |
|-----------------------------|------------------|------|-------|------------------|------|------|-------|----|
|                             | % OH             | 77   | 60-65 | 55               | 47   | 26   | 12-15 | 7  |
| Vibrational mode            |                  |      |       |                  |      |      |       |    |
| TO                          |                  |      |       | 227 (78K)        |      |      |       |    |
| LA                          |                  |      |       | 161 (78K)        |      |      |       |    |
| $\nu_L$ in H <sub>2</sub> O |                  |      |       | 525 <sup>a</sup> |      |      |       |    |
| $\nu_L$ in D <sub>2</sub> O | --               | --   | --    | --               | --   | --   | --    | -- |
| $\nu_2$ (surf)              | --               | --   | --    | --               | --   | --   | --    | -- |
| $\nu_2$                     | 1222?            | --   | --    | --               | --   | --   | --    | -- |
| $\nu_{OH}$                  | --               | --   | --    | --               | --   | --   | --    | -- |
| $\nu_{OD}$                  | --               | --   | --    | 2437             | 2435 | 2435 | 2433  |    |
| $d_{OH}$                    | --               | --   | --    | --               | --   | --   | --    | -- |
| $d_{OD}$                    | --               | --   | --    | 2725             | 2725 | 2725 | 2725  |    |
| 2 $\nu_2$                   | --               | --   | --    | --               | --   | --   | --    | -- |
| 2 $\nu_L$                   | 1222             | 1220 | 1220  | 1220             | 1211 | 1210 | 1211  |    |
| 3 $\nu_L$                   | --               | --   | --    | --               | --   | 1629 | --    |    |
| $\nu_2 + \nu_L$             | --               | --   | --    | --               | --   | --   | --    | -- |
| $\nu_2 + 2 \nu_L$           | --               | --   | --    | --               | --   | --   | --    | -- |
| $\nu_L + TO$                | --               | --   | --    | --               | --   | --   | --    | -- |
| $\nu_{OH} + TO$             | --               | --   | --    | --               | --   | --   | --    | -- |
| $\nu_{OH} + LA/TO$          | --               | --   | --    | --               | --   | --   | --    | -- |

<sup>a</sup> Buch 2003: M. W. Severson, J. P. Devlin and V. Buch, *J. Chem. Phys.*, **119**, 4449 (2003)

**Supplementary table S2d:** Positions of overtone and combination bands involving the  $\nu_2$ ,  $\nu_L$ , TO and LA modes at 190 K.

| Species                     | H <sub>2</sub> O |      | HOD  |      |      | D <sub>2</sub> O |
|-----------------------------|------------------|------|------|------|------|------------------|
|                             | % OH             | 98   | 88   | 98   | 88   | 5                |
| Vibrational mode            |                  |      |      |      |      |                  |
| TO                          | 233 <sup>a</sup> |      | --   | --   | --   | --               |
| LA                          | 166 <sup>a</sup> |      | --   | --   | --   | --               |
| $\nu_L$ in H <sub>2</sub> O | 845              | 836  | --   | --   | --   | --               |
| $\nu_L$ in D <sub>2</sub> O | --               | --   | --   | --   | 804  | 644              |
| $\nu_2$ (surf)              | --               | --   | --   | --   | --   | --               |
| $\nu_2$                     | --               | --   | --   | 1486 | 1506 | --               |
| $\nu_{OH}$                  | 3240             | 3245 | --   | --   | 3288 | --               |
| $\nu_{OD}$                  | --               | --   | 2428 | 2429 | --   | 2441             |
| $d_{OH}$                    | --               | --   | --   | --   | --   | --               |
| $d_{OD}$                    | --               | --   | --   | --   | --   | --               |
| $2\nu_2$                    | --               | --   | --   | --   | --   | --               |
| $2\nu_L$                    | 1561             | 1565 | --   | --   | --   | 1207             |
| $3\nu_L$                    | 2247             | --   | --   | --   | --   | 1631             |
| $\nu_2+\nu_L$               | --               | --   | --   | 1955 | --   | --               |
| $\nu_2+2\nu_L$              | --               | --   | --   | --   | --   | --               |
| $\nu_{OH}+TO$               | 1100?            | --   | --   | --   | --   | --               |

<sup>a</sup> C. Medcraft, D. McNaughton, C. D. Thompson, D. R. T. Appadoo, S. Bauerecker and E. G. Robertson, *Phys. Chem. Chem. Phys.*, **15**, 3630 (2013)
